# Supplementary material for: Nickel biopathways in tropical nickel hyperaccumulating trees from Sabah (Malaysia)
Source: PubMed Central journal article supplement (PMC5311975; doi:10.1038/srep41861), 2017-02-16
Supplement: srep41861-s1.pdf [file srep41861-s1.pdf]

# Nickel biopathways in tropical nickel hyperaccumulating trees from Sabah (Malaysia)

Antony van der Ent<sup>1,2\*</sup>, Damien L. Callahan<sup>3</sup>, Barry N. Noller<sup>1</sup>, Jolanta Mesjasz-Przybylowicz<sup>4</sup>,  
Wojciech J. Przybylowicz<sup>4,5</sup>, Alban Barnabas<sup>4</sup>, Hugh H. Harris<sup>6\*</sup>

<sup>1</sup>Centre for Mined Land Rehabilitation, Sustainable Minerals Institute, The University of Queensland, Queensland, Australia

<sup>2</sup>Université de Lorraine–INRA, Laboratoire Sols et Environnement, UMR 1120, France

<sup>3</sup>Deakin University, Geelong, Australia. School of Life and Environmental Sciences, Centre for Chemistry and Biotechnology (Burwood Campus), Victoria, Australia

<sup>4</sup>Materials Research Department, iThemba LABS, National Research Foundation, Somerset West, South Africa

<sup>5</sup>AGH University of Science and Technology, Faculty of Physics & Applied Computer Science, Krakow, Poland

<sup>6</sup>Department of Chemistry, The University of Adelaide, South Australia, Australia

\* [a.vanderent@uq.edu.au](mailto:a.vanderent@uq.edu.au) & [hugh.harris@adelaide.edu.au](mailto:hugh.harris@adelaide.edu.au)

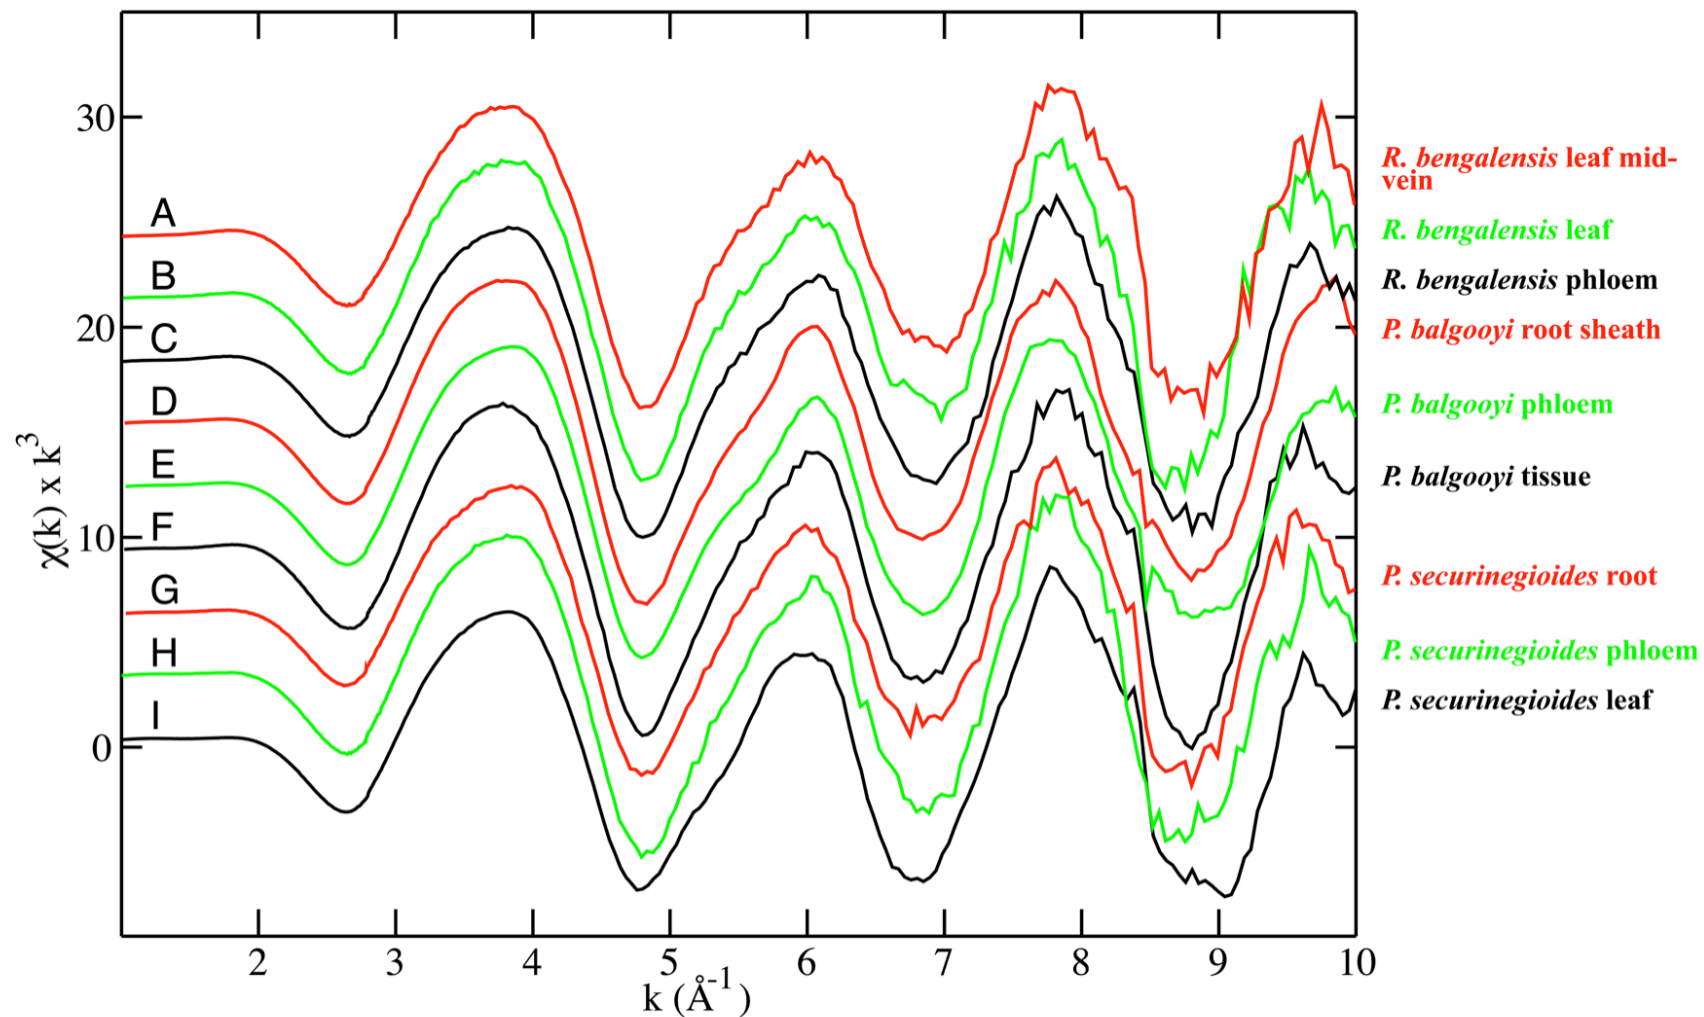

**Supplementary Figure 1.** Ni K-edge extended X-ray absorption structure for **A**, *Rinorea bengalensis* leaf mid-vein tissue; **B**, *Rinorea bengalensis* leaf tissue; **C**, *Rinorea bengalensis* phloem tissue; **D**, *Phyllanthus balgooyi* root sheath tissue; **E**, *Phyllanthus balgooyi* phloem tissue; **F**, *Phyllanthus balgooyi* leaf tissue; **G**, *Phyllanthus securinegioides* root tissue; **H**, *Phyllanthus securinegioides* phloem tissue; **I**, *Phyllanthus securinegioides* leaf tissue.

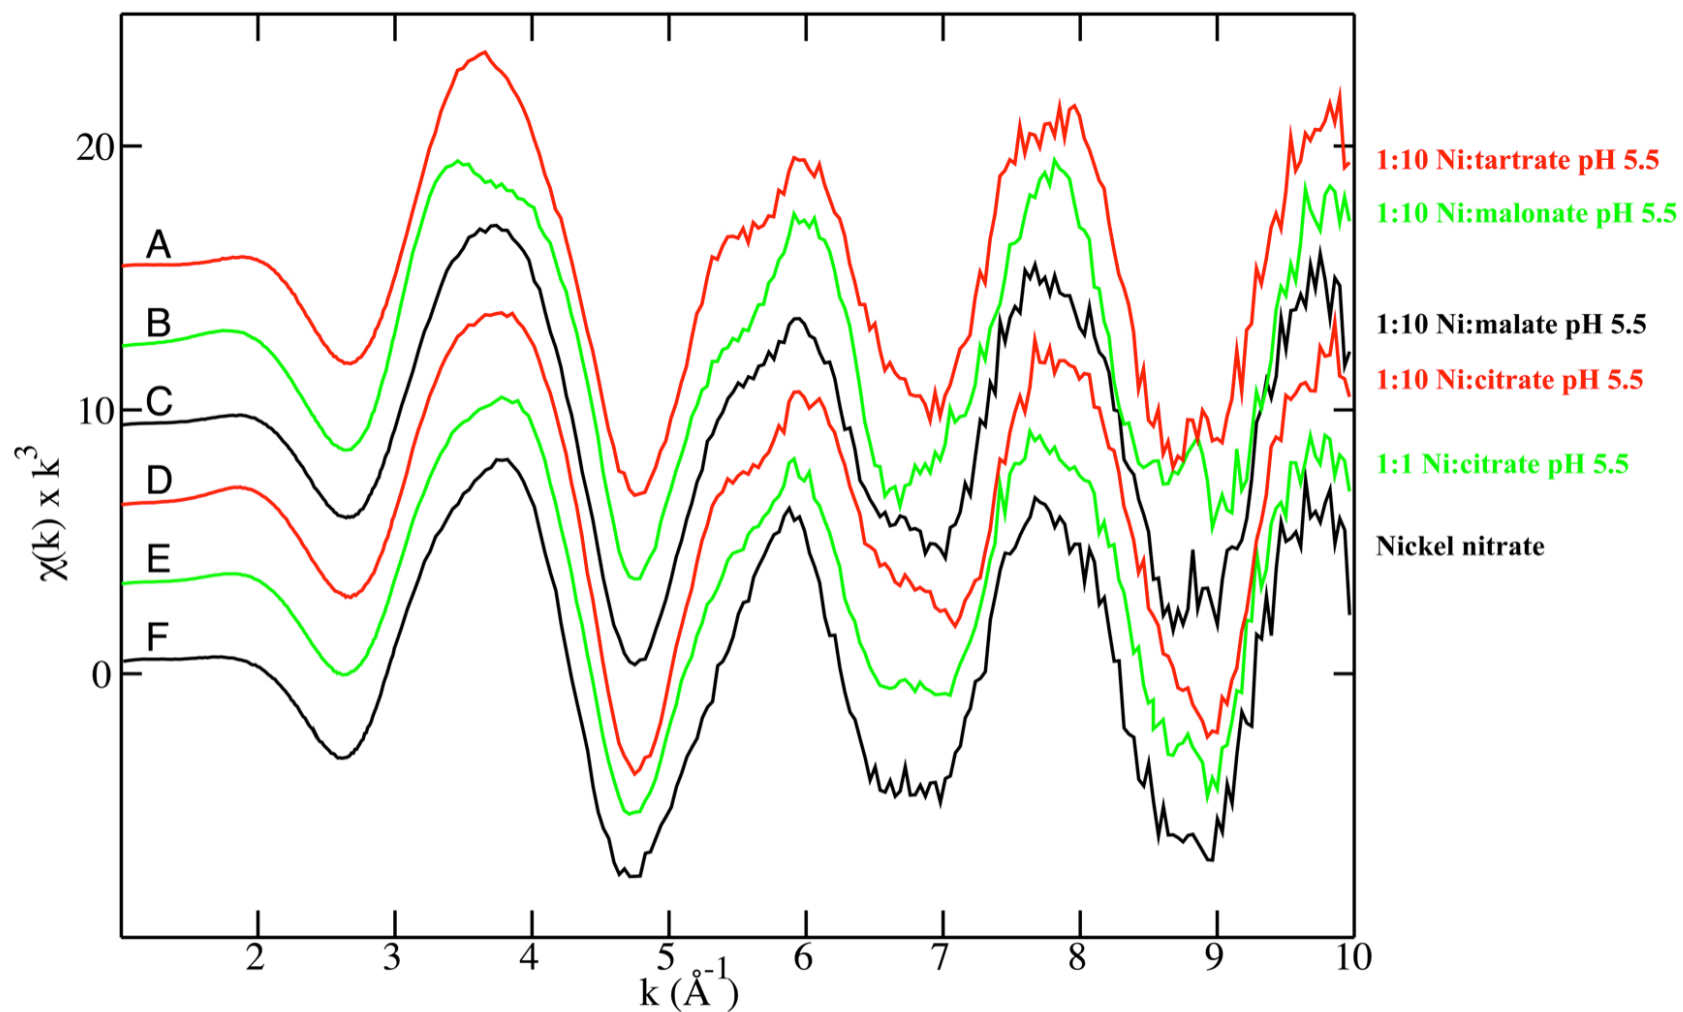

**Supplementary Figure 2.** Ni K-edge extended X-ray absorption structure for **A**, 1:10 Ni:tartrate in aqueous solution at pH 5.5; **B**, 1:10 Ni:malonate in aqueous solution at pH 5.5; **C**, 1:10 Ni:malate in aqueous solution at pH 5.5; **D**, 1:10 Ni:citrate in aqueous solution at pH 5.5; **E**, 1:1 Ni:citrate in aqueous solution at pH 5.5; **F**, Ni:nitrate in aqueous solution (*i.e.*  $[\text{Ni}(\text{H}_2\text{O})_6]^{2+}$ ).

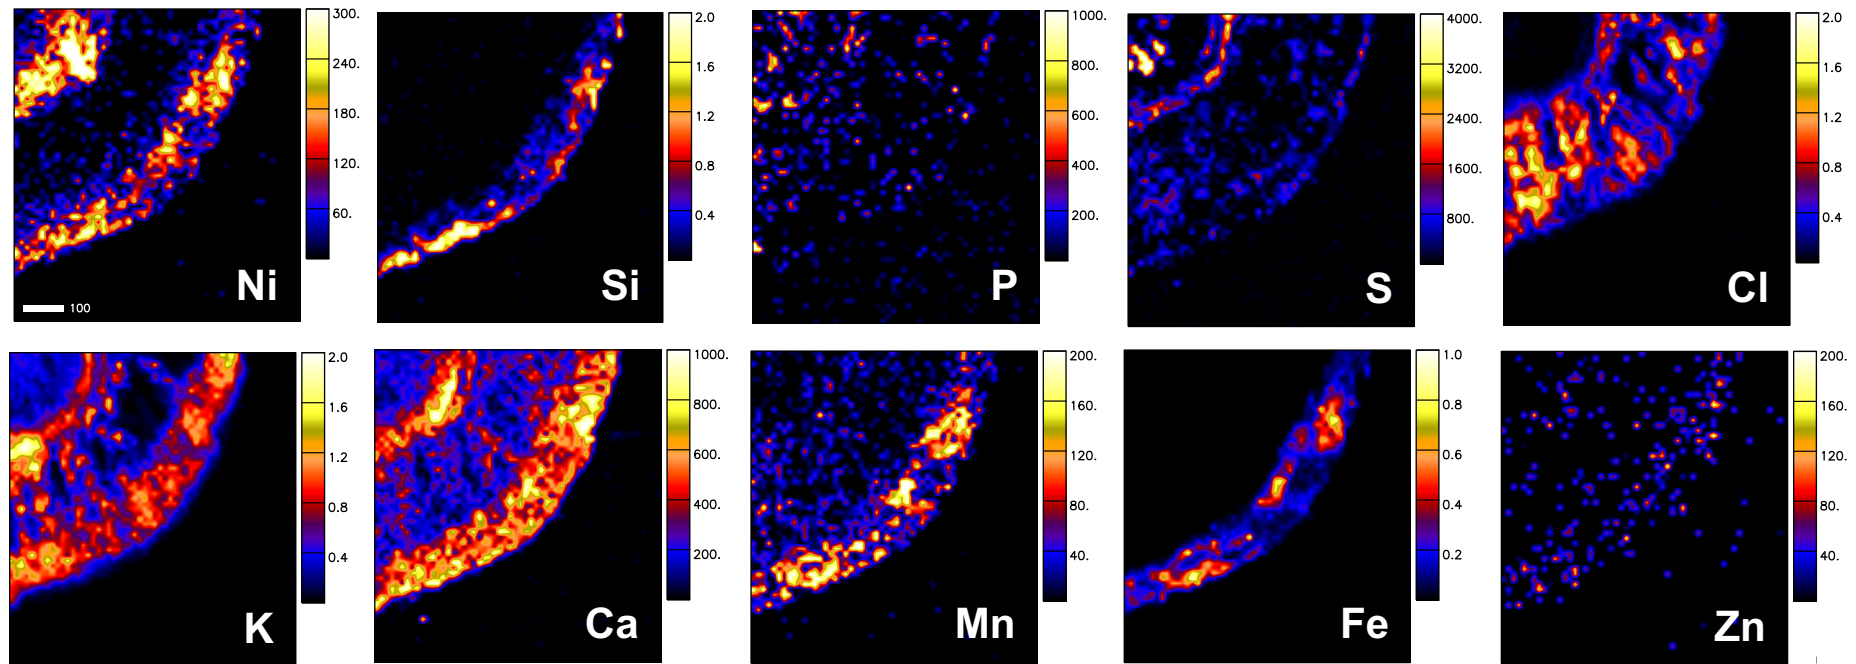

**Supplementary Figure 3.** Elemental maps of root cross-section of *Phyllanthus balgooyi*. Concentration scale in wt% dry weight (for Si, Cl, K and Fe) and  $\mu\text{g g}^{-1}$  dry weight (for Ni, P, S, Ca, Mn and Zn). Scale bar – 100  $\mu\text{m}$ .

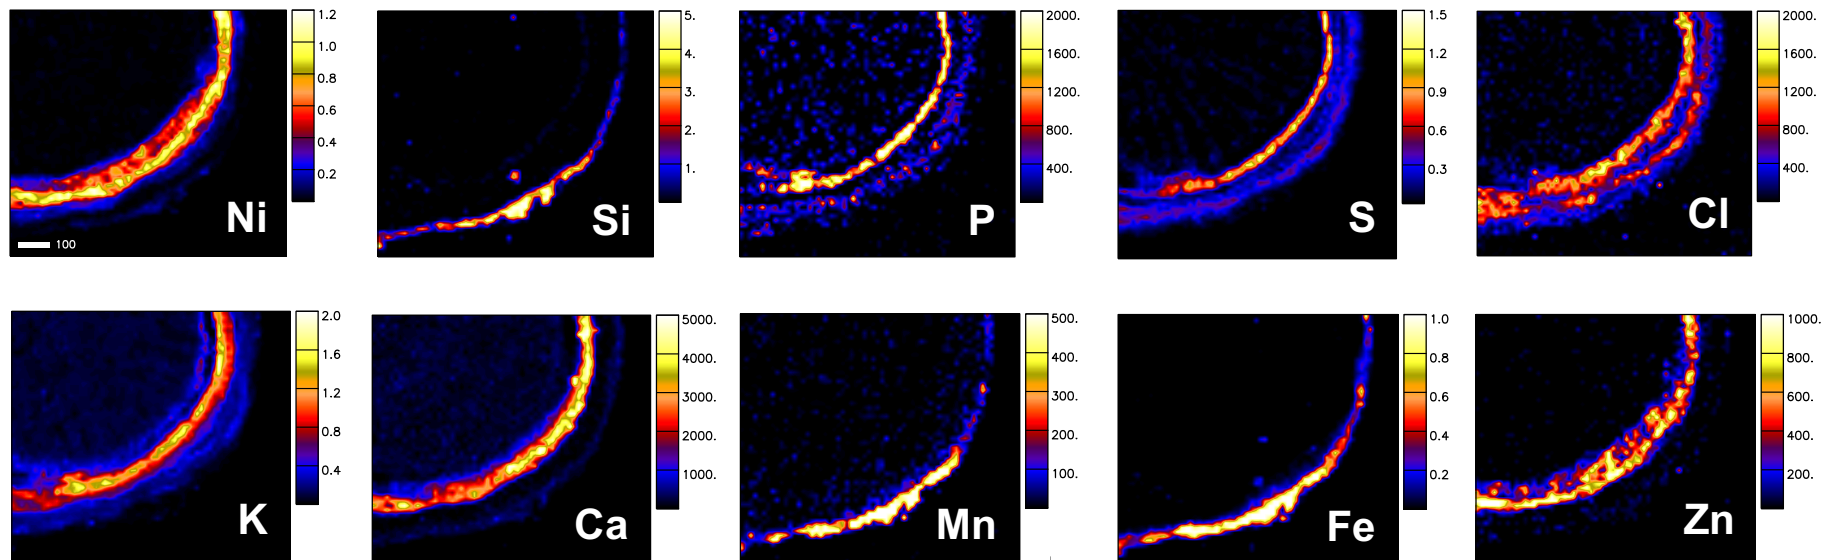

**Supplementary Figure 4.** Elemental maps of root cross-section of *Phyllanthus securinegioides*. Concentration scale in wt% dry weight (for Ni, Si, S, K and Fe) and  $\mu\text{g g}^{-1}$  dry weight (for P, Cl, Ca, Mn and Zn). Scale bar – 100  $\mu\text{m}$ .

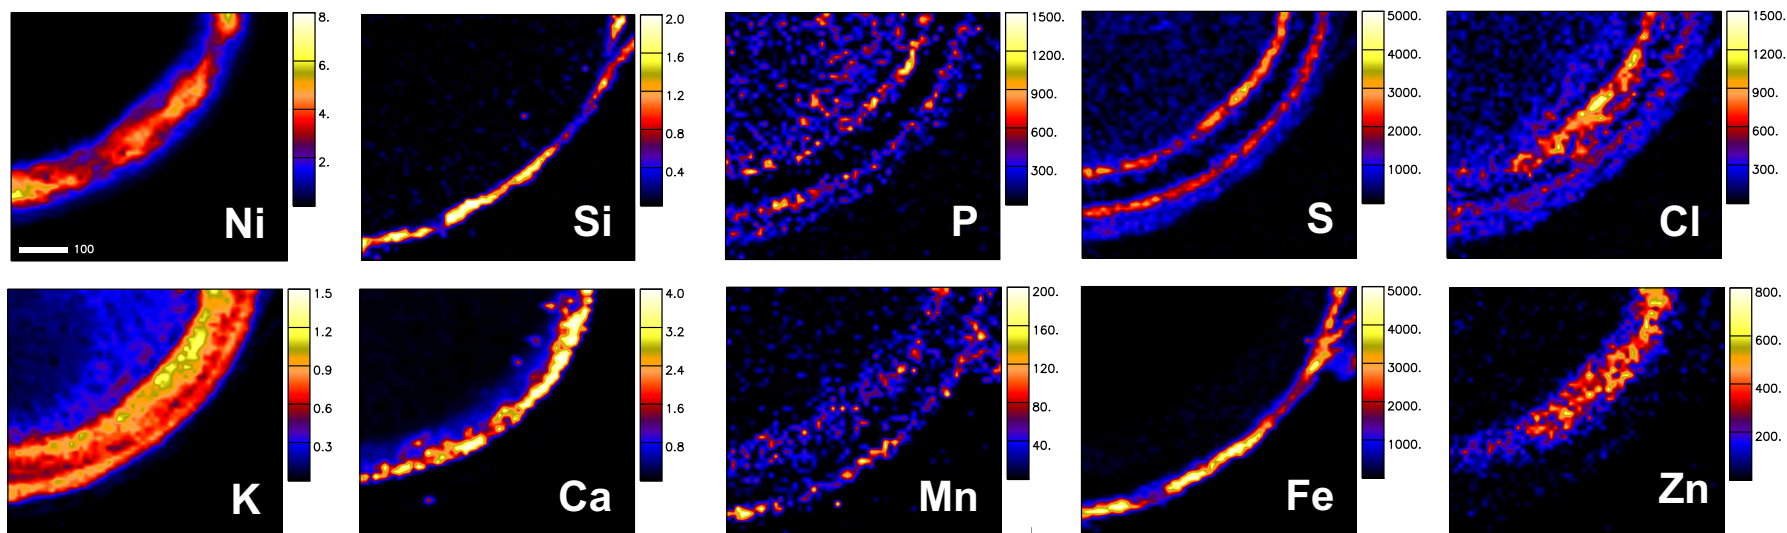

**Supplementary Figure 5.** Elemental maps of root cross-section of *Rinorea bengalensis*. Concentration scale in wt% dry weight (for Ni, Si, K and Ca) and  $\mu\text{g g}^{-1}$  dry weight (for P, S, Cl, Mn, Fe and Zn). Scale bar – 100  $\mu\text{m}$ .



*Phyllanthus balgooyi* (stem section)

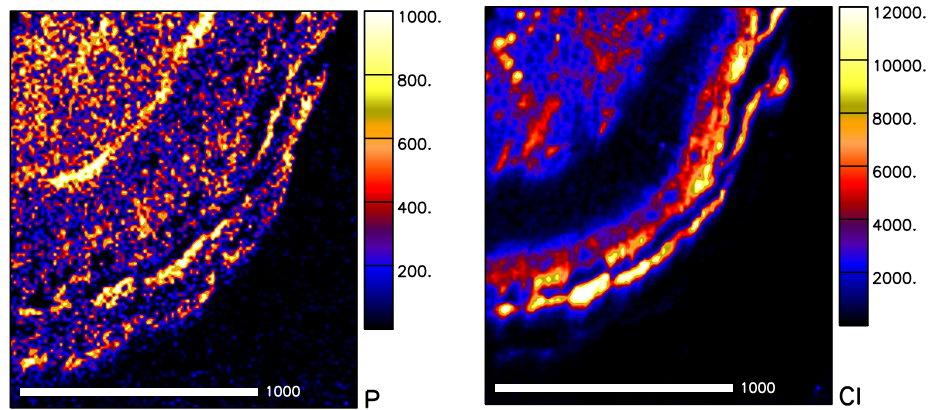

*Phyllanthus securinegoides* (stem section)

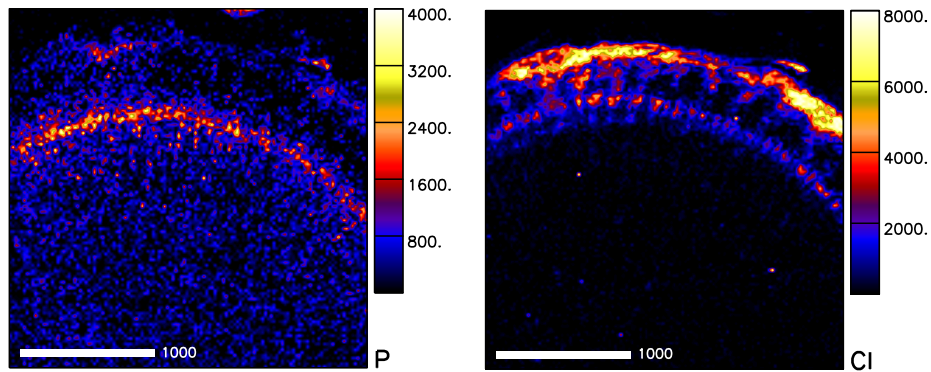

*Rinorea bengalensis* (stem section)

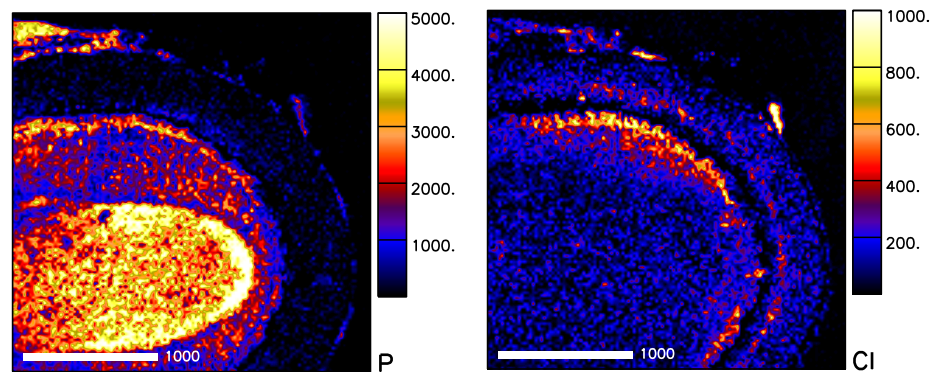

**Supplementary Figure 6.** Elemental maps of stem cross-sections of *Phyllanthus balgooyi*, *Phyllanthus securinegoides* and *Rinorea bengalensis*. Concentration scale in  $\mu\text{g g}^{-1}$  dry weight. Scale bar – 1000  $\mu\text{m}$ .

*Phyllanthus balgooyi* (leaf section)

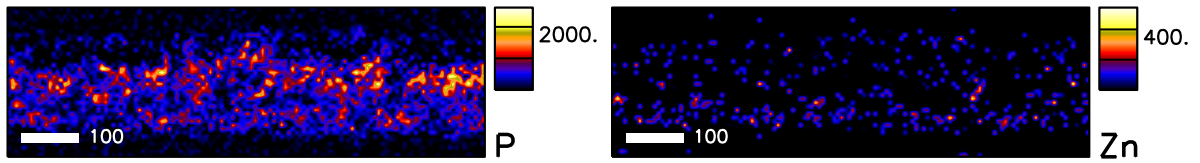

*Phyllanthus securinegioides* (leaf section)

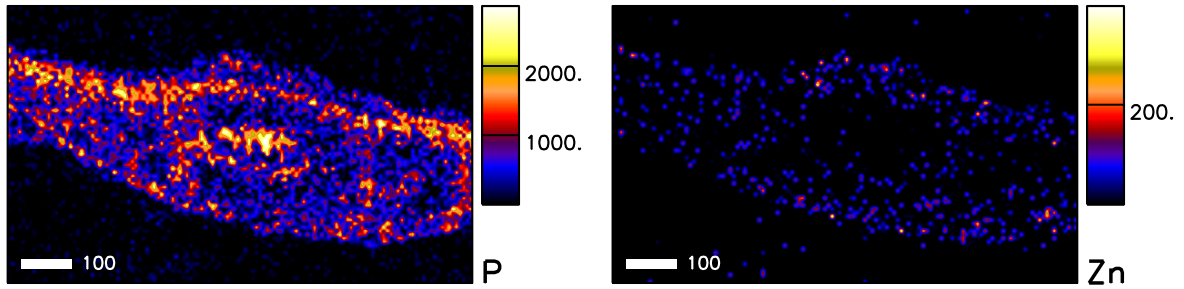

*Rinorea bengalensis* (leaf section)

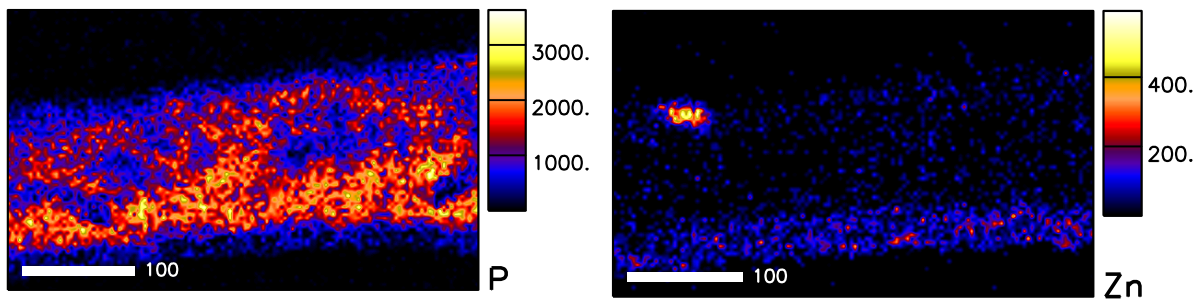

**Supplementary Figure 7.** Elemental maps of leaf cross-sections of *Phyllanthus balgooyi*, *Phyllanthus securinegioides* and *Rinorea bengalensis*. Concentration scale in  $\mu\text{g g}^{-1}$  dry weight. Scale bar – 100  $\mu\text{m}$ .
